# Supplementary material for: Plastics in sea surface waters around the Antarctic Peninsula
Source: PubMed Central journal article supplement (PMC6408452; doi:10.1038/s41598-019-40311-4), 2019-03-08

# Plastics in sea surface waters around the Antarctic Peninsula

Ana Luzia de F. Lacerda\*, Lucas dos S. Rodrigues, Erik van Sebille, Fábio L. Rodrigues, Lourenço Ribeiro, Eduardo R. Secchi, Felipe Kessler, Maíra C. Proietti

## Supplementary Information

Figure S1. Linear regression between the abundance of plastics at each sampling point and sea state (a), wind speed (b) and local depth (c); no statistically significant correlation was observed ( $p > 0.05$ ).

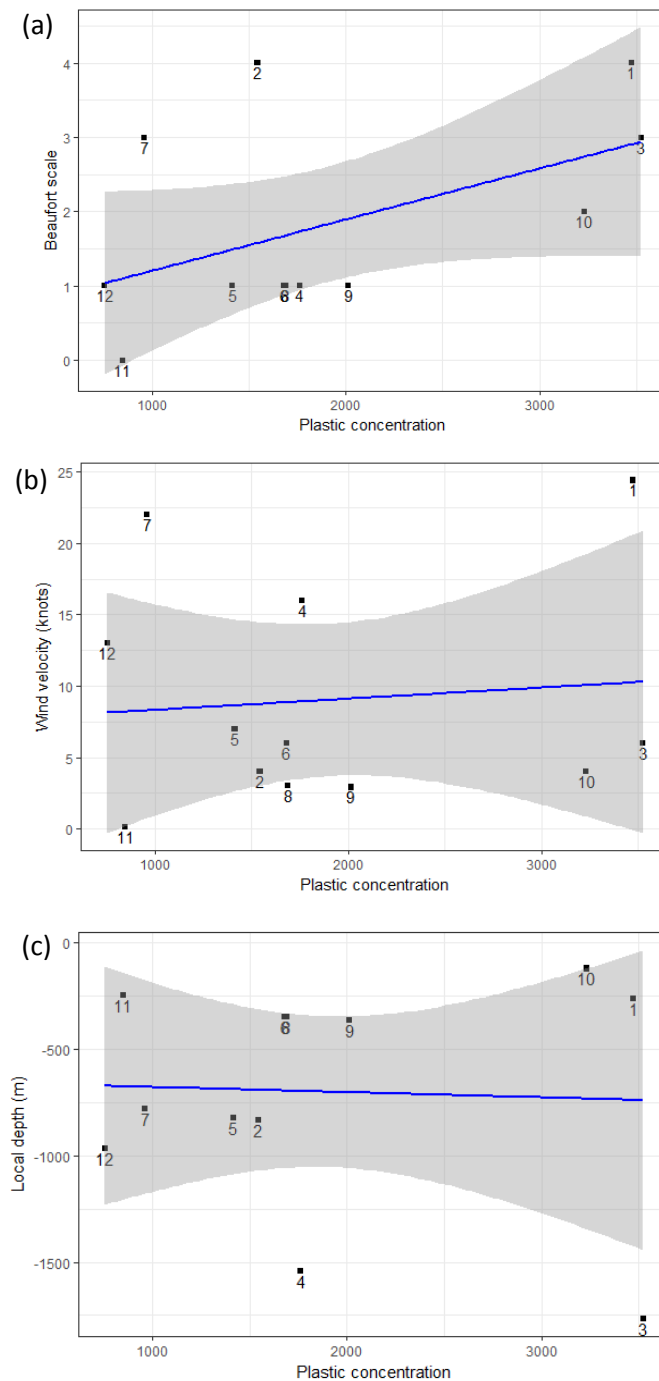

Supplement: 41598_2019_40311_MOESM1_ESM.pdf [file 41598_2019_40311_MOESM1_ESM.pdf]
